# Supplementary material for: Automated Brainstem Segmentation Detects Differential Involvement in Atypical Parkinsonian Syndromes
Source: PubMed Central journal article supplement — J Mov Disord. 2019 Sep 26;13(1):39–46. doi: 10.14802/jmd.19030 (PMC6987532; doi:10.14802/jmd.19030), 2019-09-26
Supplement: jmd-19030-suppl.pdf [file jmd-19030-suppl.pdf]

**Supplementary Table 1.** Statistical comparisons of the brainstem volumetric measures between variant PSP and controls

| Group comparisons |          | Medulla   | Pons      | SCP   | Midbrain  | Whole brainstem |
|-------------------|----------|-----------|-----------|-------|-----------|-----------------|
| Controls          |          |           |           |       |           |                 |
| PSP-CBS           | <i>p</i> | < 0.0005* | < 0.0005* | 0.005 | < 0.0005* | < 0.0005*       |
|                   | %        | 24*       | 22*       | 28    | 26*       | 24*             |
| PSP-PGF           | <i>p</i> | 0.625     | 0.995     | 0.927 | 0.347     | 0.779           |
|                   | %        | 7         | 1         | -4    | 9         | 4               |
| PSP-P             | <i>p</i> | 0.014     | 0.002*    | 0.031 | < 0.0005* | < 0.0005*       |
|                   | %        | 17        | 24*       | 24    | 27*       | 23*             |
| PSP-F             | <i>p</i> | 0.026     | 0.051     | 0.012 | < 0.0005* | 0.009           |
|                   | %        | 14        | 15        | 31    | 22*       | 17              |
| PSP-SL            | <i>p</i> | 0.024     | 0.006     | 0.063 | < 0.0005* | 0.002*          |
|                   | %        | 17        | 22        | 18    | 25*       | 22*             |

*p* values and percentage volumetric difference between groups are shown with analyses adjusted for age, gender and scanner type. \*Significant difference between groups after correction for multiple comparisons. SCP: superior cerebellar peduncle, PSP-CBS: variant progressive supranuclear palsy (PSP) with predominant CBS, PSP-PGF: variant PSP with progressive gait freezing, PSP-P: variant PSP with predominant parkinsonism, PSP-F: variant PSP with predominant frontal presentation, PSP-SL: variant PSP with predominant speech/language disorder.
